## Prdm1 acts downstream of a sequential RA, Wnt and Fgf signaling cascade during zebrafish forelimb induction

**Nadia Mercader, Sabine Fischer and Carl J. Neumann** *Development* **133**, 2805-2815.

There were mistakes in the Materials and methods 'Treatment with DEAB, SU5402' section on p. 2806 of this paper. The whole section should therefore be replaced with the following.

4-Diethylaminobenzaldehyde (DEAB) (Fluka) and the FGF receptor inhibitor SU5402 (Calbiochem) were dissolved in dimethylsulfoxide (DMSO) and used at a concentration of 10  $\mu\text{M}$  and 16  $\mu\text{M}$ , respectively. DEAB treatment was performed from 30% epiboly onwards. Incubations were carried out in the dark at 28°C.

The authors apologise to readers for the mistakes.
